# Supplementary material
Source: PubMed Central journal article supplement (PMC5827386)
Supplement: JVI.01631-17_zjv005183347s1.pdf [file JVI.01631-17_zjv005183347s1.pdf]

**Table S 1. Predicted peptides and their binding to FLA-E\*01801 evaluated by *in vitro* refolding**

| Name        | Derived protein   | Position  | sequence  | IC50 (nM) | Stability with<br>FLA I <sup>b</sup> |
|-------------|-------------------|-----------|-----------|-----------|--------------------------------------|
| RMA9        | gag protein (FIV) | 39-48     | RMANVSTGR | 4715.8    | ++                                   |
| KMV9        | gag protein (FIV) | 151-159   | KMVSIFMEK | 3874.3    | ++                                   |
| DTV9        | VP2 protein (FCV) | 9-17      | DTVTNTIGK | 40839.1   | --                                   |
| FTA9        | gag protein (FIV) | 228-237   | FTAAEIMGI | 24185.1   | --                                   |
| TVN9        | gag protein (FIV) | 138-147   | TVNGAPQYV | 30832.6   | --                                   |
| AVM9        | gag protein (FIV) | 434-443   | AVMPSAPPM | 830.2     | --                                   |
| YSY9        | VP2 protein (FCV) | 80-88     | YSYTNQNFY | 2589.1    | --                                   |
| YVP9        | VP1 protein (FPV) | 560-568   | YVPNNIGAM | 6919.5    | --                                   |
| YTI9        | VP1 protein (FPV) | 397-405   | YTIENSVPV | 4226.2    | --                                   |
| ARM9        | gag protein (FIV) | 252-260   | AMANVSTGR | 308.4     | --                                   |
| KQR9        | pop protein (FIV) | 1031-1039 | KQRGRIGGM | 221.4     | --                                   |
| NTP9        | pop protein (FIV) | 213-221   | NTPVFAIKK | 40321.9   | ++                                   |
| NAG9        | env protein (FIV) | 79-87     | NAGKFRRAR | 20714.8   | +-                                   |
| RMA9-P1A    | mutant RMA9       | /         | AMANVSTGR | /         | ++                                   |
| RMA9-P2A    | mutant RMA9       | /         | RAANVSTGR | /         | ++                                   |
| RMA9-P4A    | mutant RMA9       | /         | RMAAVSTGR | /         | ++                                   |
| RMA9-P5A    | mutant RMA9       | /         | RMAVASTGR | /         | ++                                   |
| RMA9-P6A    | mutant RMA9       | /         | RMANVATGR | /         | +-                                   |
| RMA9-P7A    | mutant RMA9       | /         | RMANVSAGR | /         | ++                                   |
| RMA9-P8A    | mutant RMA9       | /         | RMANVSTGR | /         | ++                                   |
| RMA9-P9A    | mutant RMA9       | /         | RMANVSTAR | /         | +-                                   |
| RMA9-P2T    | mutant RMA9       | /         | RTANVSTGR | /         | ++                                   |
| RMA9-P6F    | mutant RMA9       | /         | RMANVFTGR | /         | ++                                   |
| DTV9-P2M    | mutant DTV9       | /         | DMVTNTIGK | /         | --                                   |
| DTV9-P6F    | mutant DTV9       | /         | DTVTNFIGK | /         | --                                   |
| DTV9-P2MP6F | mutant DTV9       | /         | DMVTNFIGK | /         | --                                   |
| KMV9-P2T    | mutant KMV        | /         | KTVSIFMEK | /         | ++                                   |

|          |             |   |           |   |    |
|----------|-------------|---|-----------|---|----|
| RMA9-P1D | mutant RMA9 | / | DMANVSTGR | / | -- |
| RMA9-P1I | mutant RMA9 | / | IMANVSTGR | / | ++ |
| RMA9-P1T | mutant RMA9 | / | TMANVSTGR | / | ++ |
| RMA9-P1Y | mutant RMA9 | / | YMANVSTGR | / | ++ |
| RMA9-P1W | mutant RMA9 | / | WMANVSTGR | / | ++ |
| RMA9-P1Q | mutant RMA9 | / | QMANVSTGR | / | ++ |
| DTV9-P1A | mutant DTV9 | / | ATVTNTIGK | / | ++ |
| DTV9-P1K | mutant DTV9 | / | KANVSTGR  | / | ++ |

---

<sup>a</sup> % Random is a base value for estimating the binding affinities of peptides with the NetMHCpan 2.8 server (<http://www.cbs.dtu.dk/services/NetMHCpan/>): Low ID50 (nM) = good binders.

<sup>b</sup> ++, peptide binds strongly and can tolerate anion-exchange chromatography; +-, peptide binds FLA I but cannot tolerate anion-exchange chromatography. --, indicates no refolded product
